# Supplementary material for: Cardanol-Derived Epoxy Resins as Biobased Gel Polymer Electrolytes for Potassium-Ion Conduction
Source: PubMed Central journal article supplement (PMC9112699; doi:10.1021/acsapm.2c00335), 2022-04-29
Supplement: ap2c00335_si_001.pdf [file ap2c00335_si_001.pdf]

# Supporting Information

*Eleonora Manarin<sup>a,†</sup>, Francesca Corsini<sup>a,†</sup>, Sabrina Trano<sup>b</sup>, Lucia Fagiolari<sup>b</sup>, Julia Amici<sup>b</sup>, Carlotta Francia<sup>b</sup>, Silvia Bodoardo<sup>b</sup>, Stefano Turri<sup>a</sup>, Federico Bella<sup>b,\*</sup>, Gianmarco Griffini<sup>a,\*</sup>*

<sup>a</sup>Department of Chemistry, Materials and Chemical Engineering “Giulio Natta”, Politecnico di Milano, Piazza Leonardo da Vinci 32, 20133 Milano, Italy

E-mail: [gianmarco.griffini@polimi.it](mailto:gianmarco.griffini@polimi.it)

<sup>b</sup>Department of Applied Science and Technology, Politecnico di Torino, Corso Duca degli Abruzzi 24, 10129 Torino, Italy

E-mail: [federico.bella@polito.it](mailto:federico.bella@polito.it)

## Table of Contents

|                                                             |     |
|-------------------------------------------------------------|-----|
| 1. CHEMICAL STRUCTURE OF CARDANOL-BASED EPOXY RESIN .....   | S3  |
| 2. DSC KINETICS .....                                       | S4  |
| 3. FTIR SPECTRA .....                                       | S6  |
| 4. TGA .....                                                | S7  |
| 5. DMA LINEAR VISCOELASTIC REGION CURVES .....              | S8  |
| 6. GEL FRACTION.....                                        | S9  |
| 7. MECHANICAL CHARACTERIZATION: UNIAXIAL TENSILE TESTS..... | S10 |
| 8. DSC OF CURED BIOBASED EPOXY-SAn MEMBRANES.....           | S11 |
| 9. IONIC CONDUCTIVITY .....                                 | S12 |

1. CHEMICAL STRUCTURE OF CARDANOL-BASED EPOXY RESIN

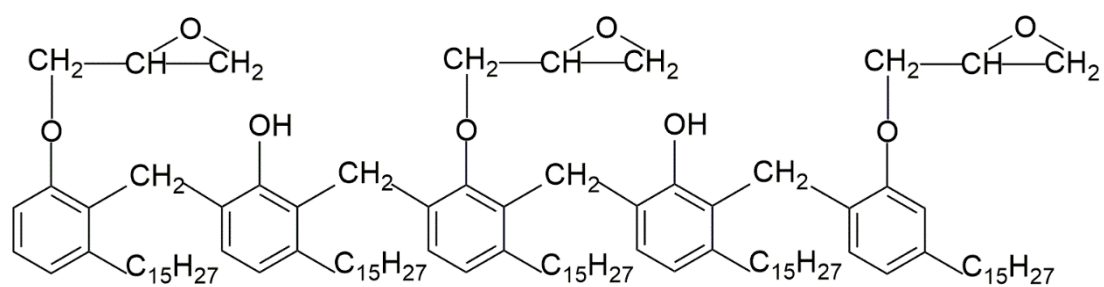

**Figure S1.** Chemical structure of Cardolite NC547.

## 2. DSC KINETICS

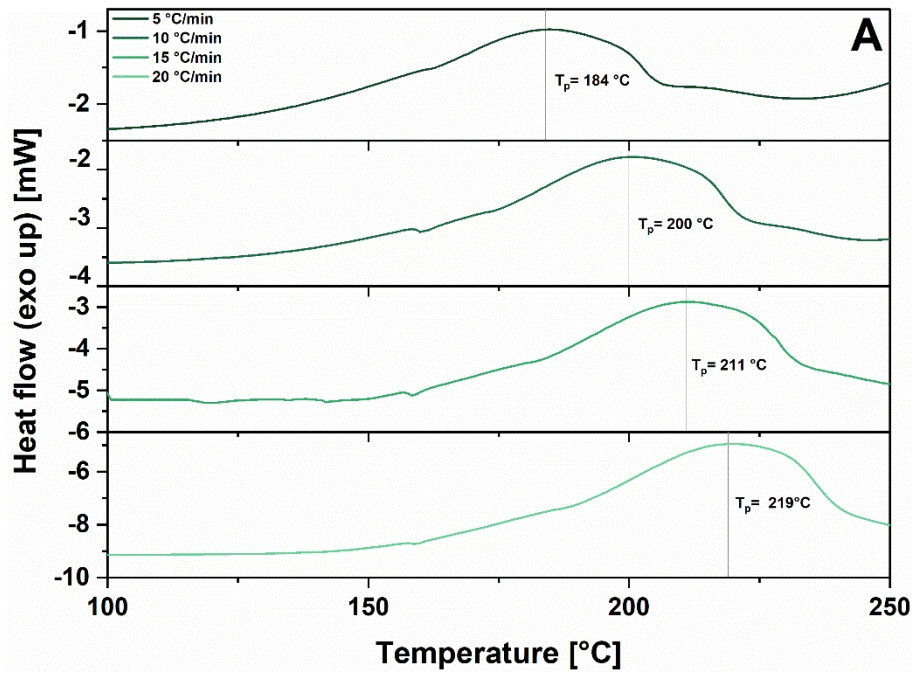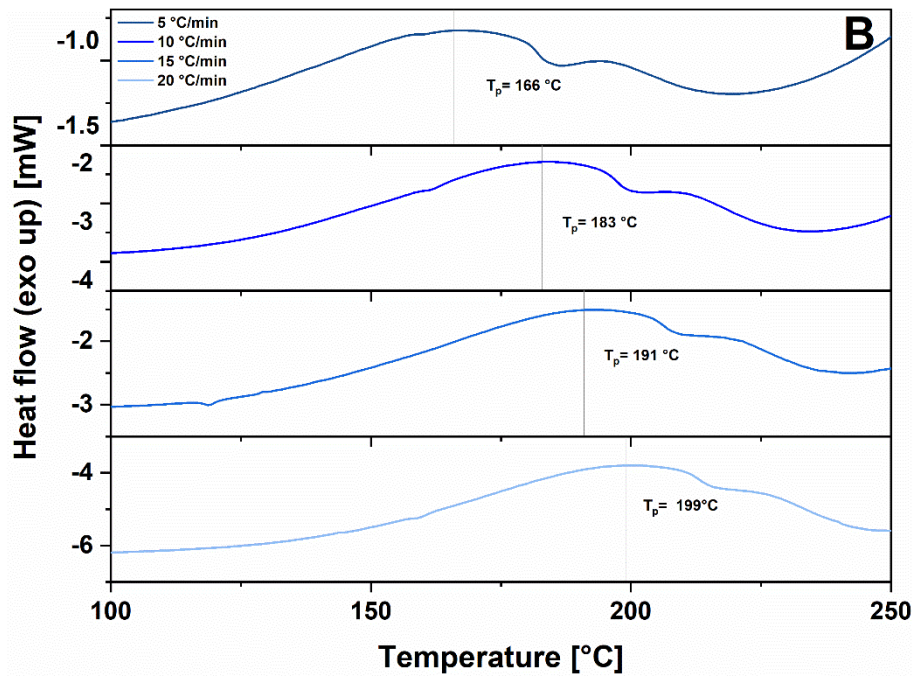

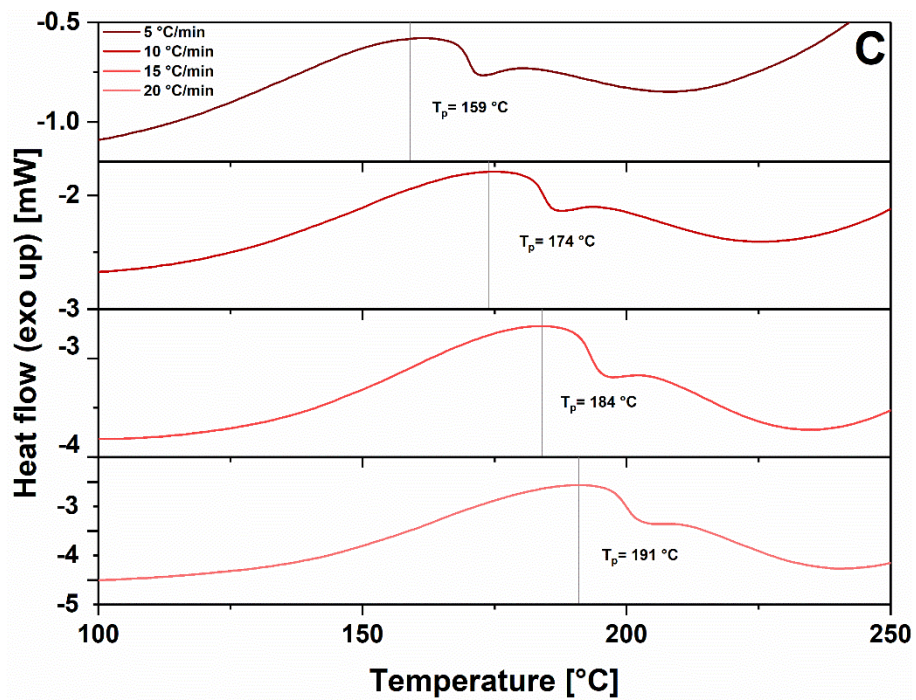

**Figure S2.** DSC profiles of A) NC547-GAn, B) NC547-SAn and C) NC547-PAn systems, highlighting the curing reaction exothermic peak during heating cycle at various heating rate.

### 3. FTIR SPECTRA

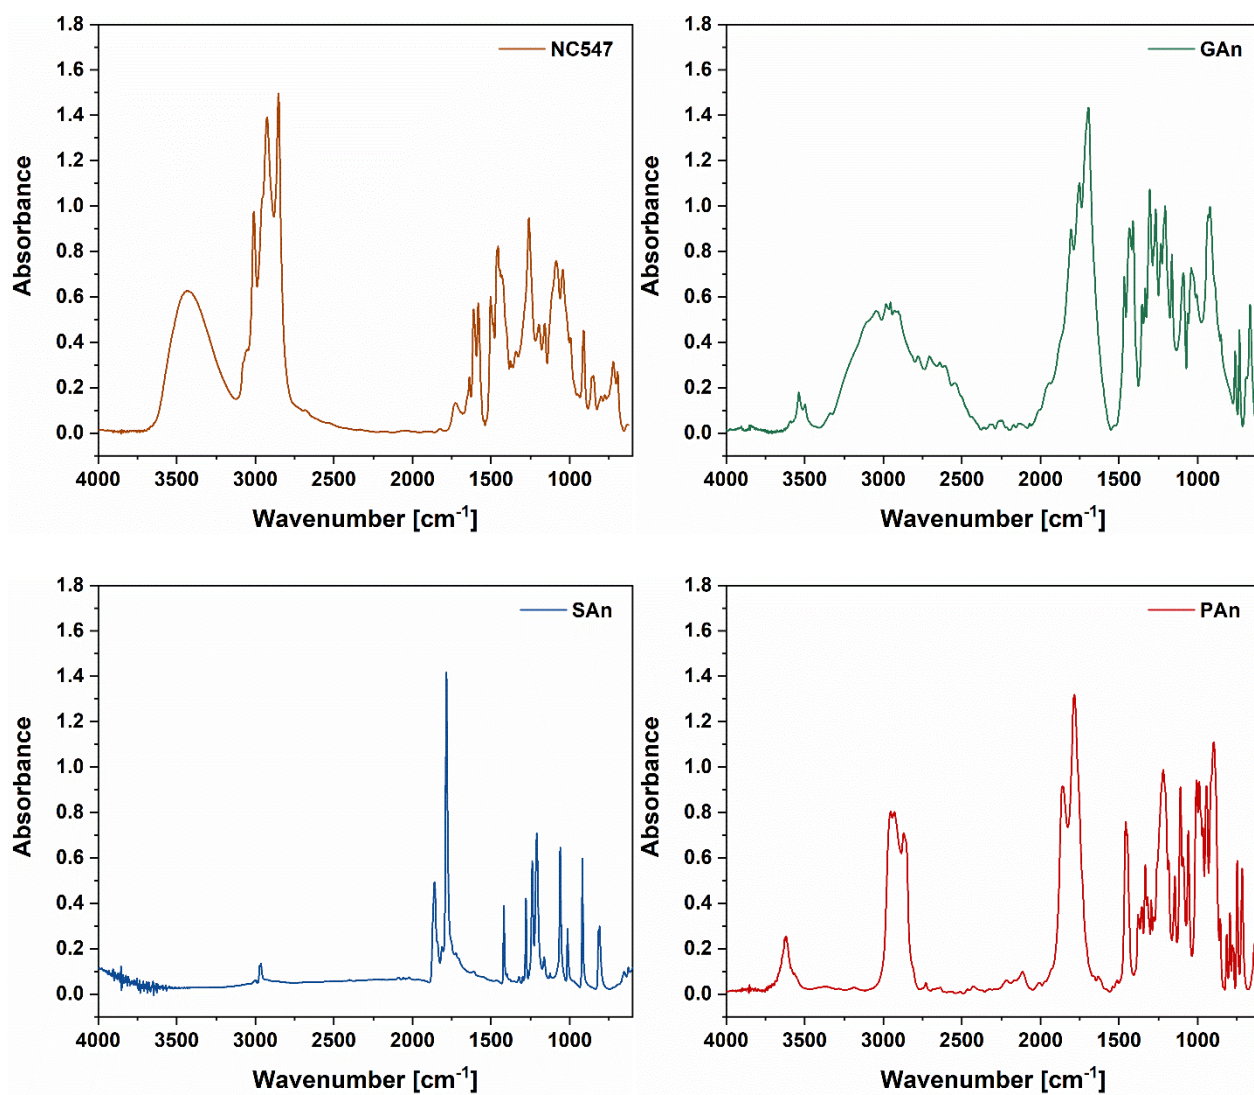

**Figure S3.** FTIR spectra of Cardolite NC547, GAn, SAn and PAn.

#### 4. TGA

**Table S1.** Degradation temperatures at 5% ( $T_{5\%}$ ) and 50% ( $T_{50\%}$ ) of weight loss and at the maximum ( $T_{\max}$ ) of the DTGA curves and char yield at 800 °C for the cardanol-derived epoxy crosslinked samples.

| <b>Composition</b> | <b><math>T_{5\%}</math> [°C]</b> | <b><math>T_{50\%}</math> [°C]</b> | <b><math>T_{\max}</math> [°C]</b> | <b>Char yield [%]</b> |
|--------------------|----------------------------------|-----------------------------------|-----------------------------------|-----------------------|
| NC547-GAn          | 333                              | 459                               | 458                               | 0.04                  |
| NC547-SAn          | 320                              | 459                               | 453                               | 0.16                  |
| NC547-PAn          | 312                              | 455                               | 451                               | 0.10                  |

## 5. DMA LINEAR VISCOELASTIC REGION CURVES

The shear storage modulus  $G'$  as a function of the strain amplitude for the three cured NC547-based membrane materials is reported in **Figure S4**. As shown, the linear viscoelastic region is evidenced by the shaded area.

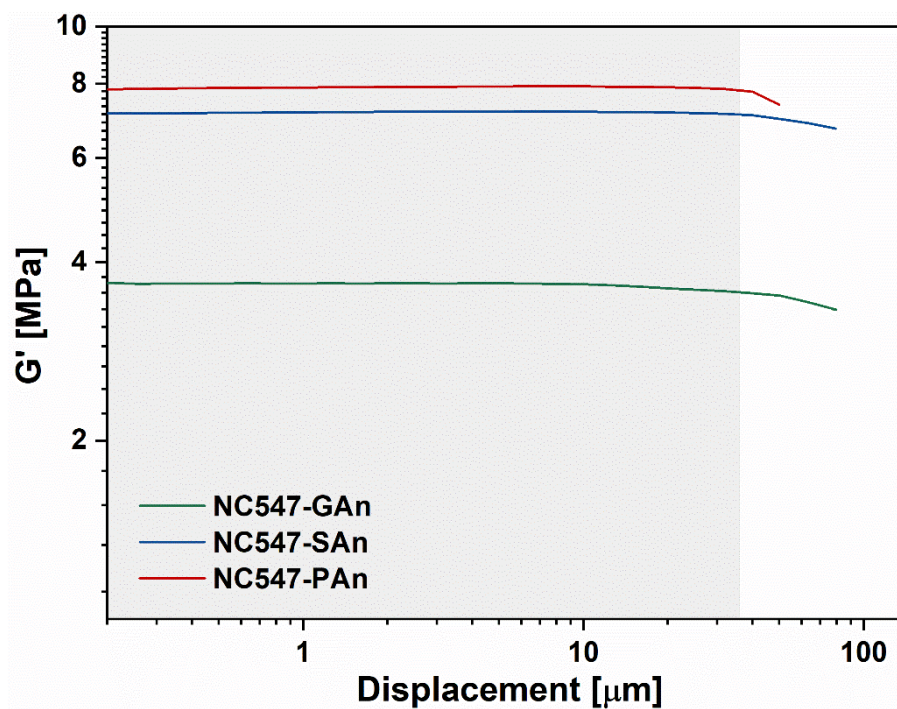

**Figure S4.**  $G'$  as a function of displacement for the three cardanol-derived epoxy crosslinked samples.



## 6. GEL FRACTION

**Table S2.** Values of gel fraction (GEL %) of the cardanol-derived epoxy crosslinked samples.

| <b>Composition</b> | <b>GEL %</b> |
|--------------------|--------------|
| NC547-GAn          | 90.4         |
| NC547-SAn          | 90.2         |
| NC547-PAn          | 91.0         |

## 7. MECHANICAL CHARACTERIZATION: UNIAXIAL TENSILE TESTS

To further corroborate the findings obtained from dynamic mechanical analysis (DMA), uniaxial tensile tests were performed according to ASTM D638-14 on 2 mm thick dumbbell-shaped specimens using a Zwick/Roell BT-FR010TH.A50 dynamometer equipped with a 10 kN load cell, applying a displacement rate of 1 mm/min. Deformation was measured using a long-stroke extensometer.

Three main figures of merits were evaluated: elastic modulus ( $E_G$ ), deformation at break ( $\varepsilon_r$ ) and ultimate tensile strength ( $\sigma_r$ ). Their values for the different materials considered in this work are reported in **Table S3**.

**Table S3.** Values of  $E_G$ ,  $\varepsilon_r$  and  $\sigma_r$  of the cardanol-derived epoxy crosslinked samples.

| <b>Composition</b> | <b><math>E_G</math> [MPa]</b> | <b><math>\sigma_r</math> [MPa]</b> | <b><math>\varepsilon_r</math> [%]</b> |
|--------------------|-------------------------------|------------------------------------|---------------------------------------|
| NC547-GAn          | $26.47 \pm 0.61$              | $0.48 \pm 0.13$                    | $2.33 \pm 0.67$                       |
| NC547-SAn          | $33.39 \pm 6.39$              | $0.52 \pm 0.07$                    | $1.98 \pm 0.32$                       |
| NC547-PAn          | $68.37 \pm 19.41$             | $1.52 \pm 0.38$                    | $3.13 \pm 0.46$                       |

8. DSC OF CURED BIOBASED EPOXY-SAn MEMBRANES

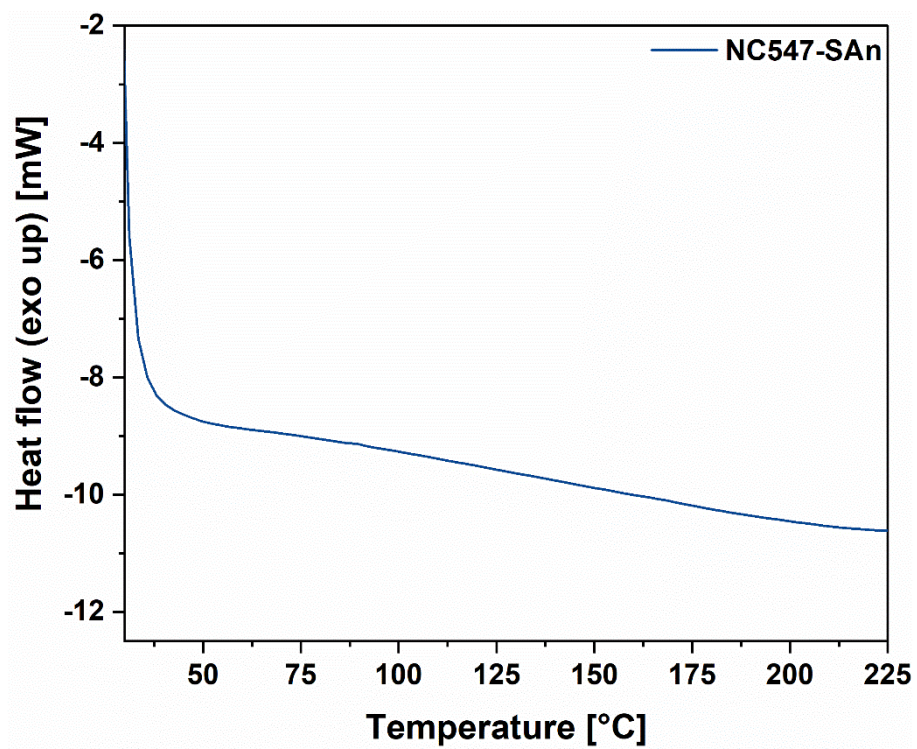

Figure S5. DSC traces of crosslinked epoxy membranes based on SAn as curing agent.

9. IONIC CONDUCTIVITY

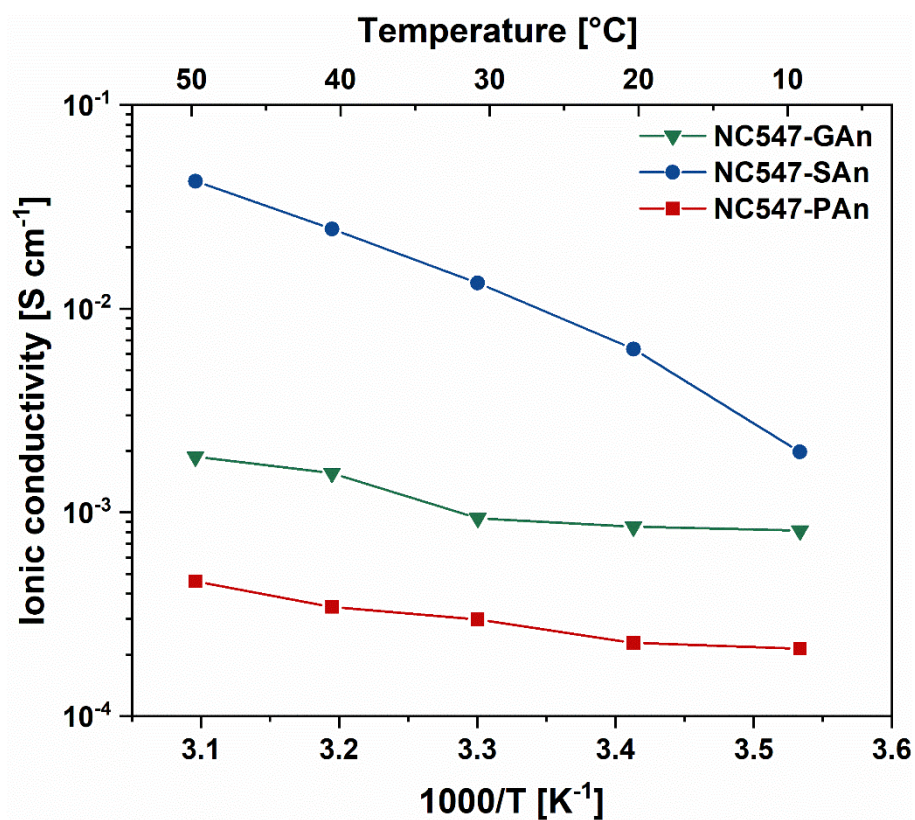

**Figure S6.** Ionic conductivity of all the three NC547-based membrane swollen in  $\text{KPF}_6$  0.80 M in EC:DEC 1:1.
